# Supplementary material for: Disposable screen-printed sensors for the electrochemical detection of TNT and DNT
Source: Royal Society of Chemistry journal article supplement (doi:10.1039/c2an36351h), 2012-11-07
Supplement: c2an36351h.pdf [file c2an36351h.pdf]

**Disposable screen-printed sensors for the electrochemical detection of TNT and DNT.**

J. Sarah Caygill<sup>1</sup>, Stuart D. Collyer<sup>2</sup>, Joanne L. Holmes<sup>1</sup>, Frank Davis<sup>1</sup>, Séamus P.J. Higson<sup>1\*</sup>

<sup>1</sup>*Cranfield Health, Vincent Building, Cranfield University, Bedfordshire, MK43 0AL, UK.*

<sup>2</sup>*Microarray Ltd, PO Box 88, Manchester, M60 1QD, UK.*

\* Corresponding author. Tel: +44(0)-1234-758516. Fax: +44(0)-1234-758380. Email address: s.p.j.higson@cranfield.ac.uk

**Supplementary information**

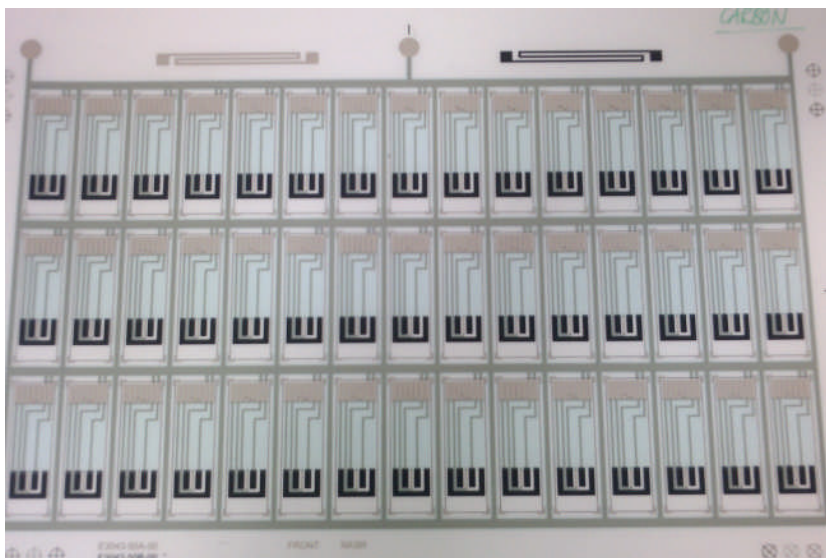

Figure S1 - A sheet of screen-printed carbon electrodes as received from Microarray (Manchester, UK)

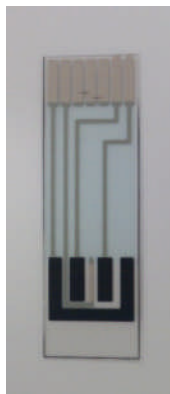

Figure S2 - An individual screen-printed sensor used in all electrochemical interrogations

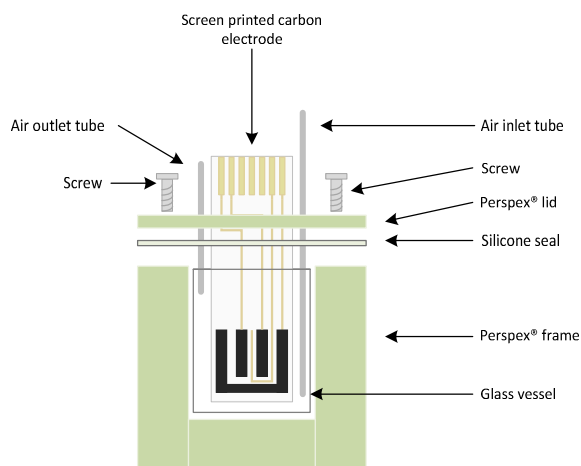

Figure S3 Schematic representation of the cell developed and used for most electrochemical interrogations

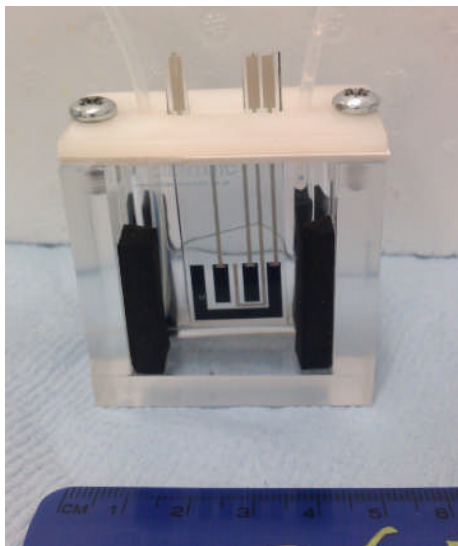

Figure S4 - Photograph of the custom designed cell used for most electrochemical interrogations

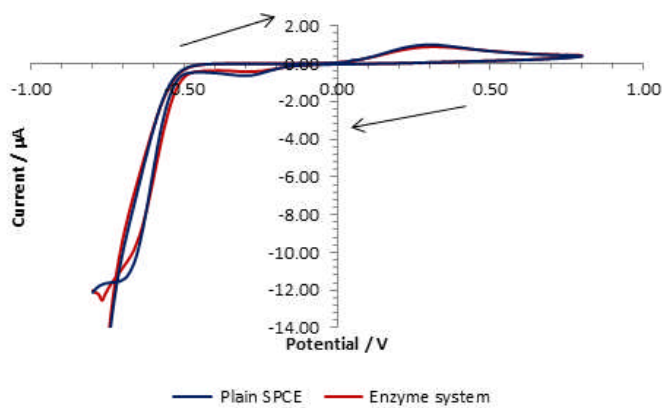

Figure S5 - Cyclic voltammograms of  $200 \mu\text{mol L}^{-1}$  solutions of TNT either with or without the enzyme system (scan rate of  $20 \text{ mVs}^{-1}$  vs. Ag/AgCl)
